# Supplementary material
Source: Elsevier journal article supplement (https://www.sciencedirect.com/science/article/pii/S1888429620300558)
Supplement: mmc1 [file S1888429620300558:mmc1.docx]

**Impact of COVID-19 on academic activities and way forward in Indian Optometry.**

**Data availability:**

1. Dataset1: 2018 survey: Rajhans, Vidyut (2020), “Dataset for survey of teaching learning methods in applied optics curriculum of optometry program”, Mendeley Data, v1

<http://dx.doi.org/10.17632/9jsjwgfksp.1>

1. Dataset2: 2020 survey: Rajhans, Vidyut (2020), “Survey for collaborative adaptation to COVID-19 crisis, in optometry education in India”, Mendeley Data, v1

<http://dx.doi.org/10.17632/xn9gtg65f6.1>
